# Supplementary material for: Pd@l-asparagine–EDTA–chitosan: a highly effective and reusable bio-based and biodegradable catalyst for the Heck cross-coupling reaction under mild conditions
Source: Royal Society of Chemistry journal article supplement (doi:10.1039/d3na00058c), 2023-01-01
Supplement: d3na00058c1.pdf [file d3na00058c1.pdf]

Electronic Supplementary Information

**Pd@L-Asparagine-EDTA-Chitosan: A highly effective and reusable bio-based and biodegradable catalyst for Heck Cross-Coupling Reaction under mild conditions**

Mohammad Dohendou <sup>a</sup>, Mohammad G. Dekamin<sup>a\*</sup>, Danial Namaki<sup>a</sup>

*<sup>a</sup>Pharmaceutical and Heterocyclic Compounds Research Laboratory Department of Chemistry Iran University of Science and Technology. Email: mdekamin@iust.ac.ir*

| Contents | Page |
|----------|------|
|----------|------|

|                                                                                                                                                                                                                                   |         |
|-----------------------------------------------------------------------------------------------------------------------------------------------------------------------------------------------------------------------------------|---------|
| Title page                                                                                                                                                                                                                        | S1      |
| Graphical Abstract                                                                                                                                                                                                                | S3      |
| <b>Fig. S1</b> Model reaction and Catalyst Preparation                                                                                                                                                                            | S4-S5   |
| <b>Fig. S2</b> Mixed FTIR spectrums of catalyst <b>1</b> from initial section.                                                                                                                                                    | S6      |
| <b>Fig. S3</b> EDS spectra of Pd@ASP-EDTA-CS organocatalyst ( <b>1</b> ).                                                                                                                                                         | S7      |
| <b>Fig. S4</b> FESEM images of Pd@ASP-EDTA-CS catalyst ( <b>1</b> ).                                                                                                                                                              | S8-S9   |
| <b>Fig. S5a</b> DRS pattern of Pd@ASP-EDTA-CS catalyst ( <b>1</b> ).                                                                                                                                                              | S9      |
| <b>Fig. S5b</b> DRS pattern of Pd@ASP-EDTA-CS catalyst ( <b>1</b> ) in second axis.                                                                                                                                               | S10     |
| <b>Fig. S6</b> XRD pattern of Pd@ASP-EDTA-CS catalyst ( <b>1</b> ).                                                                                                                                                               | S11     |
| <b>Fig. S7</b> (a) TGA and (b) diff. TGA Curves of the catalyst ( <b>1</b> ).                                                                                                                                                     | S12     |
| <b>Fig. S8</b> The N <sub>2</sub> adsorption–desorption isotherm of catalyst ( <b>1</b> ).                                                                                                                                        | S13     |
| <b>Table 1.</b> Optimization of the conditions for HCR in the model reaction of Iodobenzene ( <b>3a</b> ), methyl acrylate ( <b>4b</b> ) to afford <b>5b</b> under different conditions in the presence of catalyst ( <b>1</b> ). | S13     |
| <b>Fig. S9</b> Investigation of the optimized amount of the catalyst <b>1</b> in different solvents for HCR.                                                                                                                      | S14     |
| <b>Table 2</b> investigation of the synthesis of desired derivatives of cinnamic acid ( <b>5 a–h</b> ) through HCR catalyzed by catalyst <b>1</b> under the optimized conditions.                                                 | S15-S17 |
| <b>Table 3</b> The comparison of the obtained results for HCR using catalyst <b>1</b> and other catalysts.                                                                                                                        | S17     |
| <b>Fig. S10</b> Reusability of the Catalyst <b>1</b> in the model reaction to afford <b>5b</b> .                                                                                                                                  | S18     |
| <b>Scheme 2</b> The proposed mechanism for the synthesis cinnamic acid derivatives using aryl halides and active alkenes in the presence of catalyst <b>1</b> .                                                                   | S18     |
| <b>Fig. S11</b> FTIR of cinnamic acid.                                                                                                                                                                                            | S19     |
| <b>Fig. S12</b> <sup>1</sup> H NMR of cinnamic acid.                                                                                                                                                                              | S19     |
| <b>Fig. S13</b> FTIR of Methyl Cinnamate.                                                                                                                                                                                         | S20     |
| <b>Fig. S14</b> FTIR of Ethyl Cinnamate.                                                                                                                                                                                          | S20     |
| <b>Fig. S15</b> FTIR of Butyl Cinnamate.                                                                                                                                                                                          | S21     |
| <b>Fig. S16</b> FTIR of EDTA Dianhydride.                                                                                                                                                                                         | S21     |
| <b>Fig. S17</b> FTIR of Chitosan.                                                                                                                                                                                                 | S22     |
| <b>Fig. S18</b> Mixed FTIR spectrums of catalyst <b>1</b> from initial section.                                                                                                                                                   | S22     |

## Graphical Abstract

# Pd@L-Asparagine-EDTA-Chitosan: A highly effective and reusable bio-based and biodegradable catalyst for Heck Cross-Coupling Reaction under mild conditions

Mohammad Dohendou <sup>a</sup>, Mohammad G. Dekamin<sup>a\*</sup>, Danial Namaki<sup>a</sup>

A novel supramolecular Pd(II) catalyst supported on chitosan grafted by L-asparagine, and EDTA linker named Pd@ASP-EDTA-CS was prepared and characterized by applicable spectroscopic and analytical techniques. The heterogeneous low-loaded Pd catalyst was successfully employed in the Heck cross-coupling reaction (HCR) in good to excellent yields with proper reusability.

### Model Reaction:

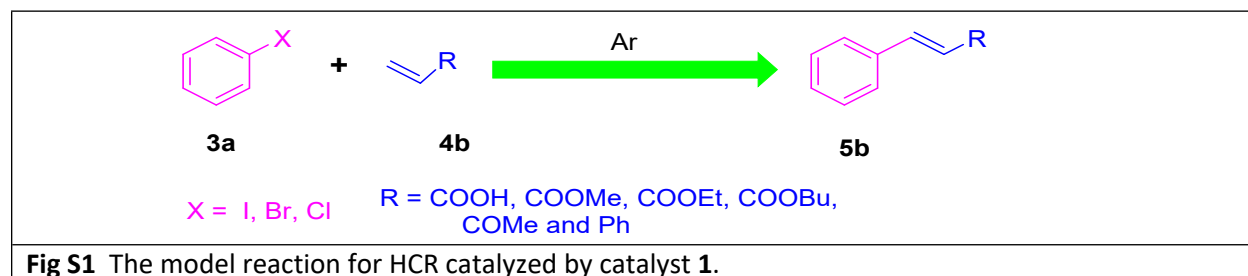

### Catalyst Preparation:

The graphical procedure for the synthesis of the catalyst is shown in Scheme S1.

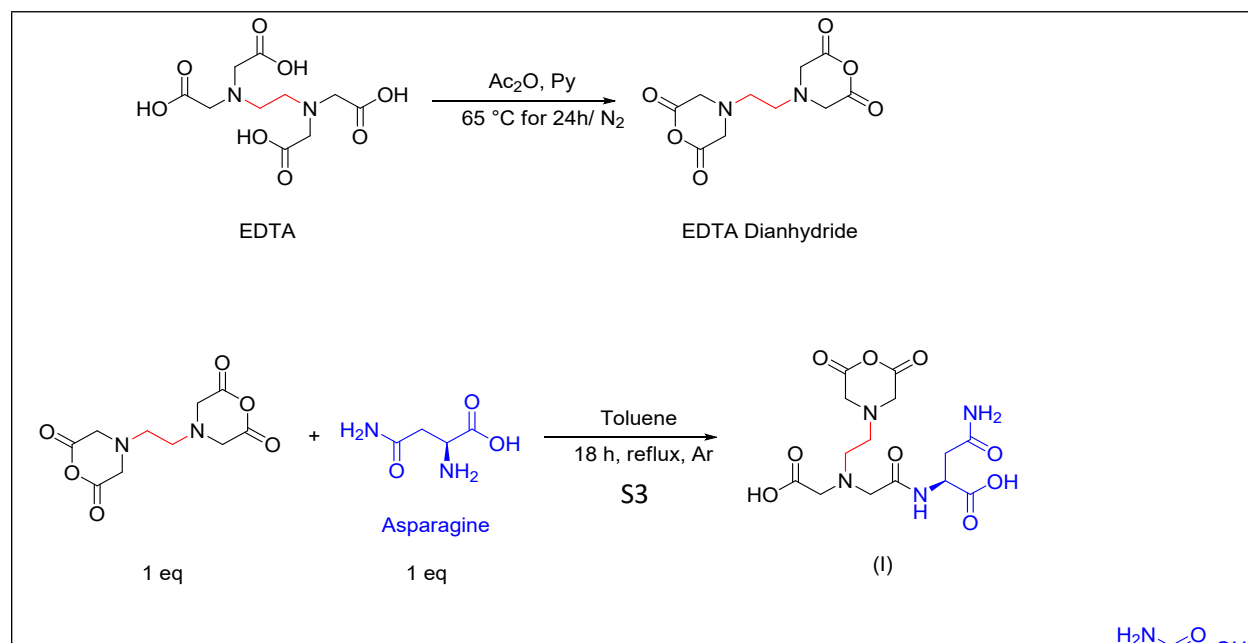

**Scheme 1** Schematic representation of (Pd@ASP-EDTA-CS) catalyst (1) preparation steps.

## FTIR Spectra:

The FTIR spectra of the catalyst **1** components are illustrated in (Fig. S2).

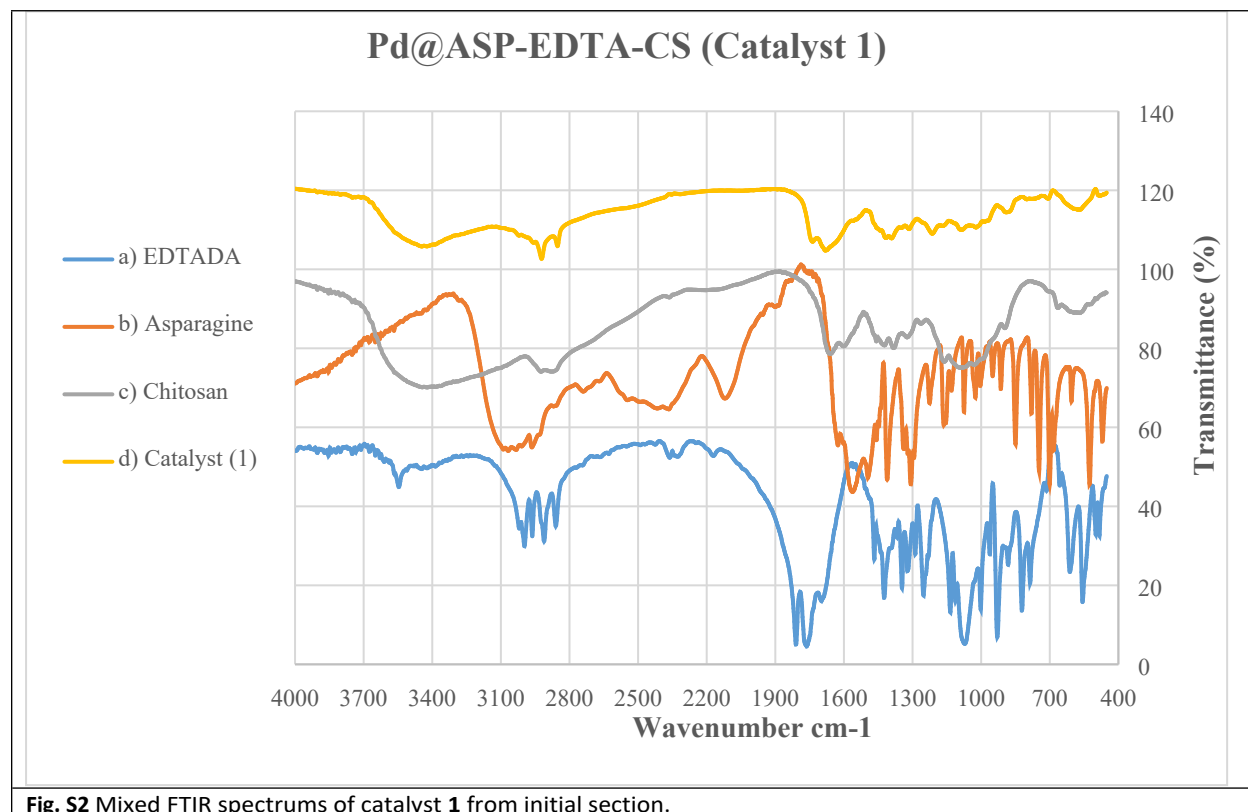

**Fig. S2** Mixed FTIR spectrums of catalyst **1** from initial section.

The observed bands at 3400-3600 are attributed to hydroxyl and amine groups, the vibration double bands of C=O groups in EDTA dianhydride stand in 1810 and 1760 respectively which are displaced by amidic and acidic groups during the processes at 1675  $\text{cm}^{-1}$  and 1733  $\text{cm}^{-1}$ . The  $\text{SP}^3$  C-H bands are shown at 2900-3000  $\text{cm}^{-1}$  and peaks at 1200-1400  $\text{cm}^{-1}$  are assigned to the bending of -NH groups. The C-O stretching band is located at about 1100  $\text{cm}^{-1}$ .

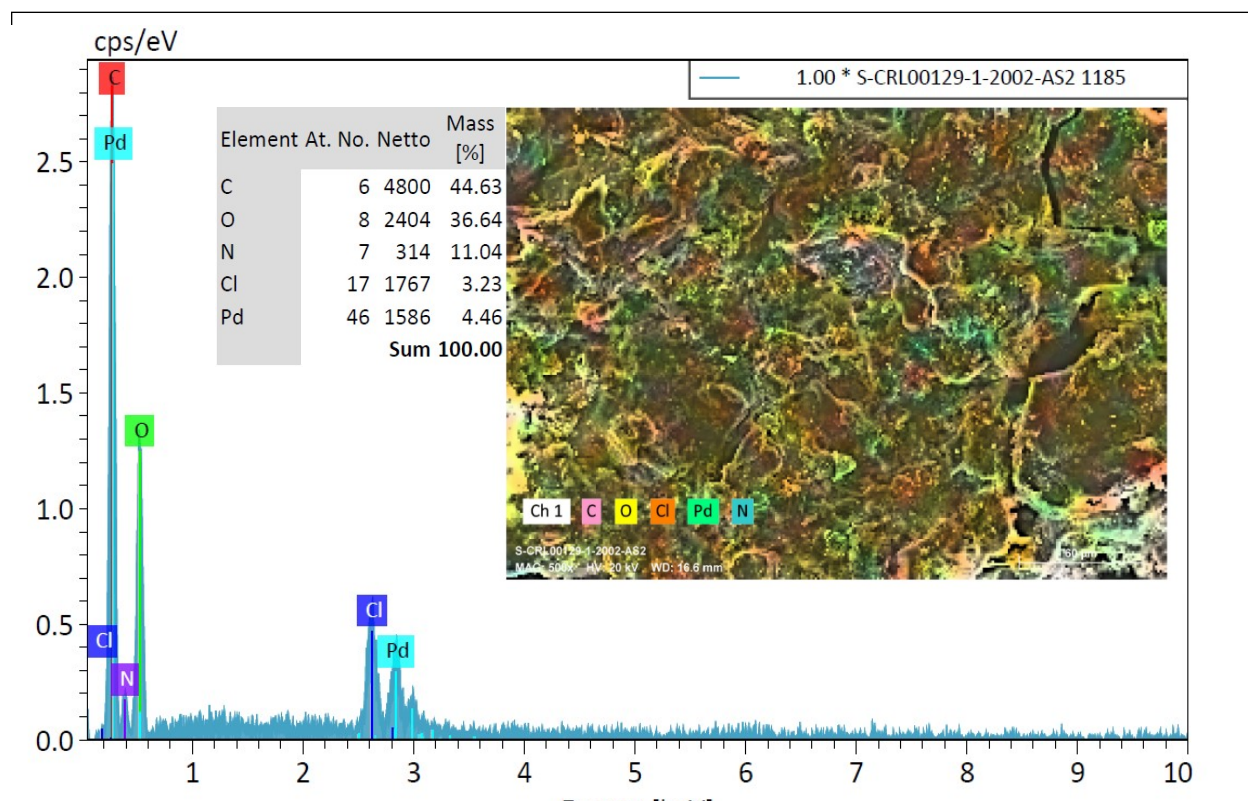

**Fig. S3** EDS spectrum of Pd@ASP-EDTA-CS organocatalyst (1).

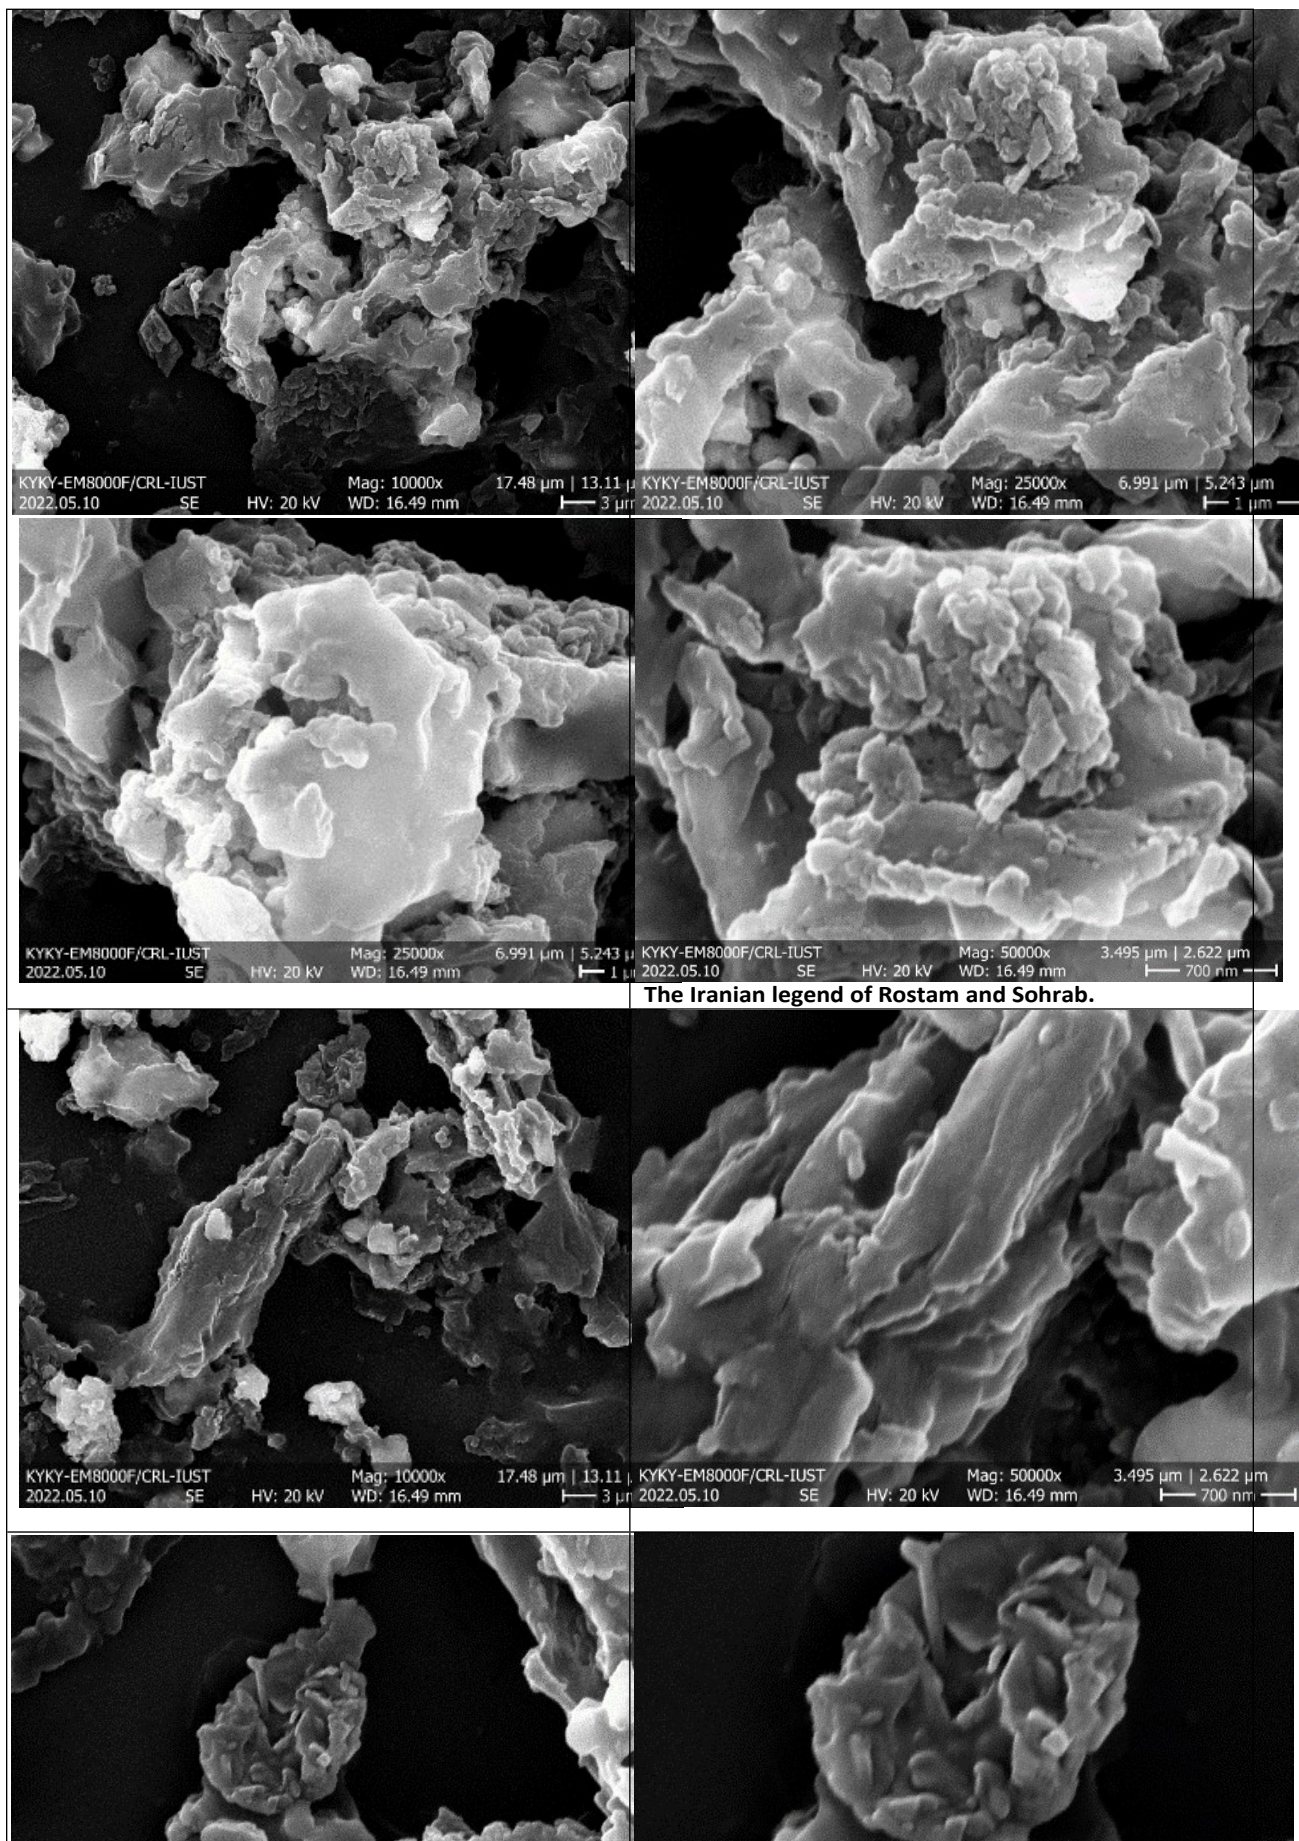

**Fig. S4** FESEM images of Pd@ASP-EDTA-CS catalyst (1).

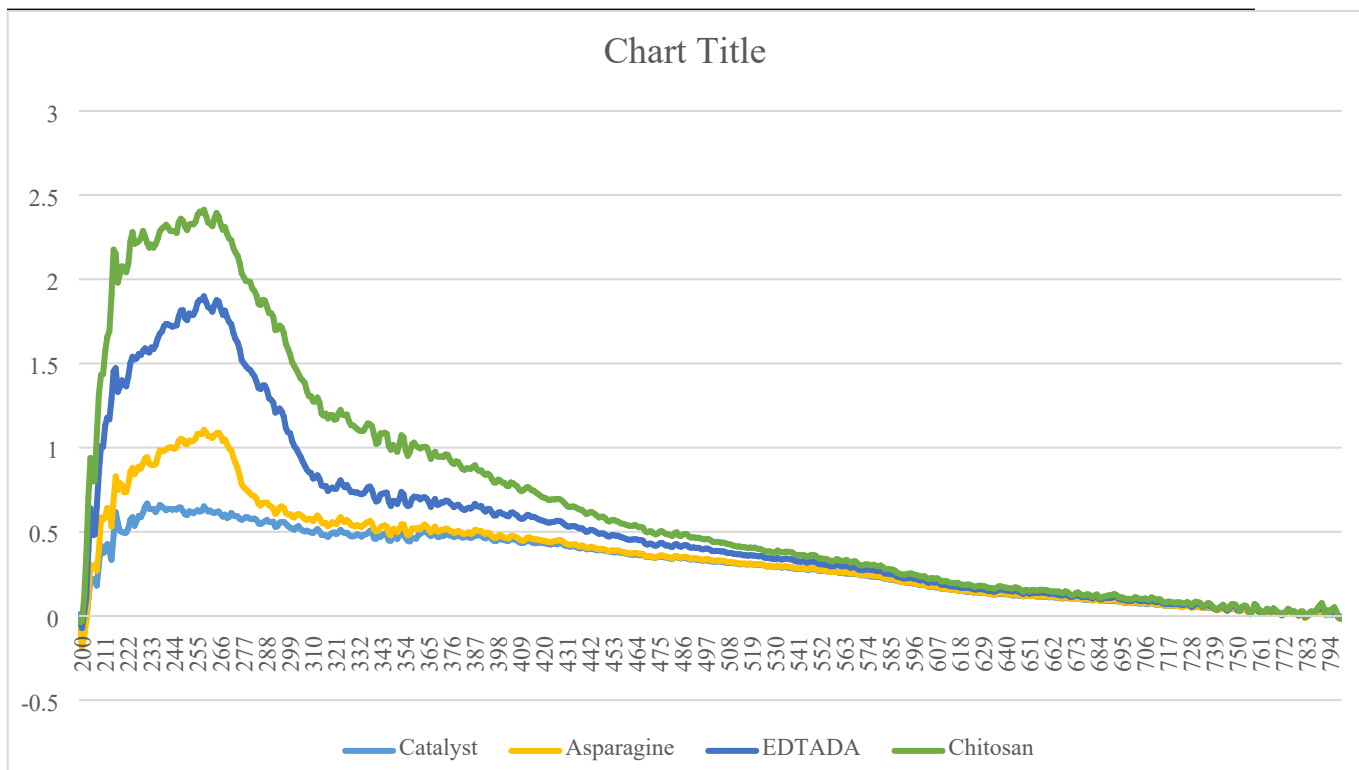

**Fig. S5a** DRS pattern of Pd@ASP-EDTA-CS catalyst (1).

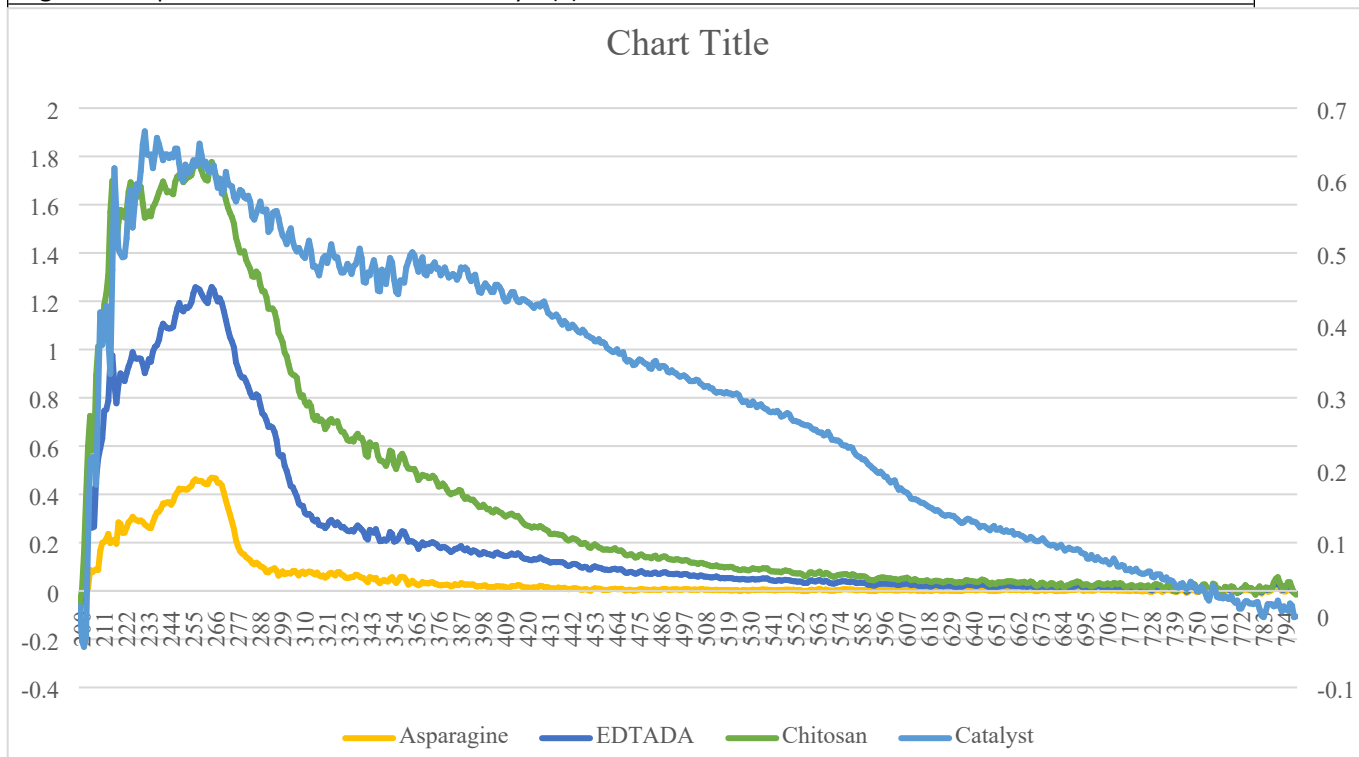

**Fig. S5b** DRS pattern of Pd@ASP-EDTA-CS in second axis for catalyst (1).

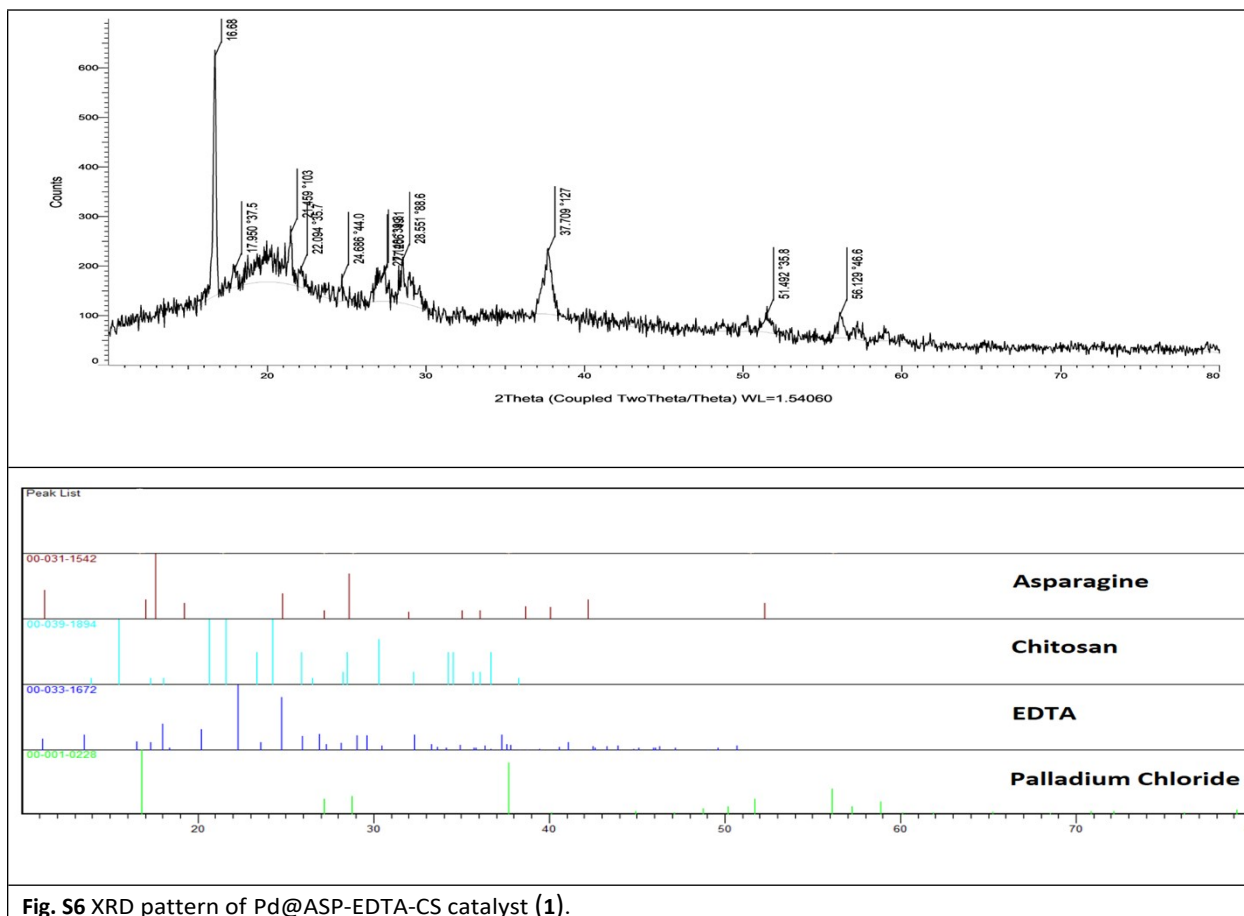

Fig. S6 XRD pattern of Pd@ASP-EDTA-CS catalyst (1).

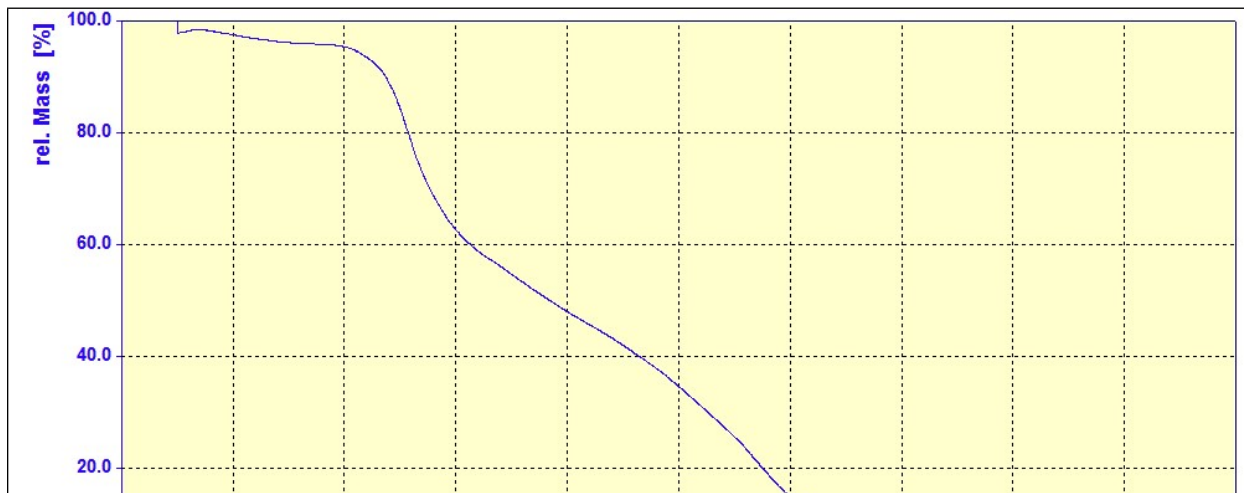



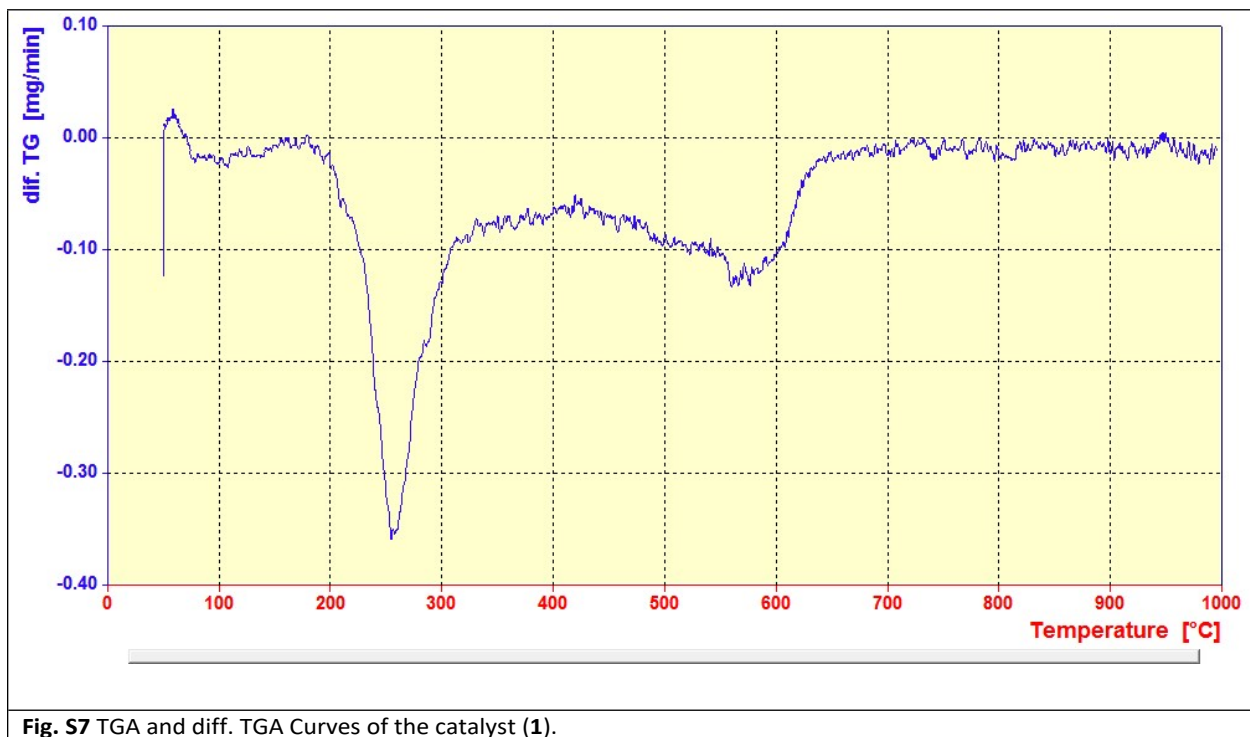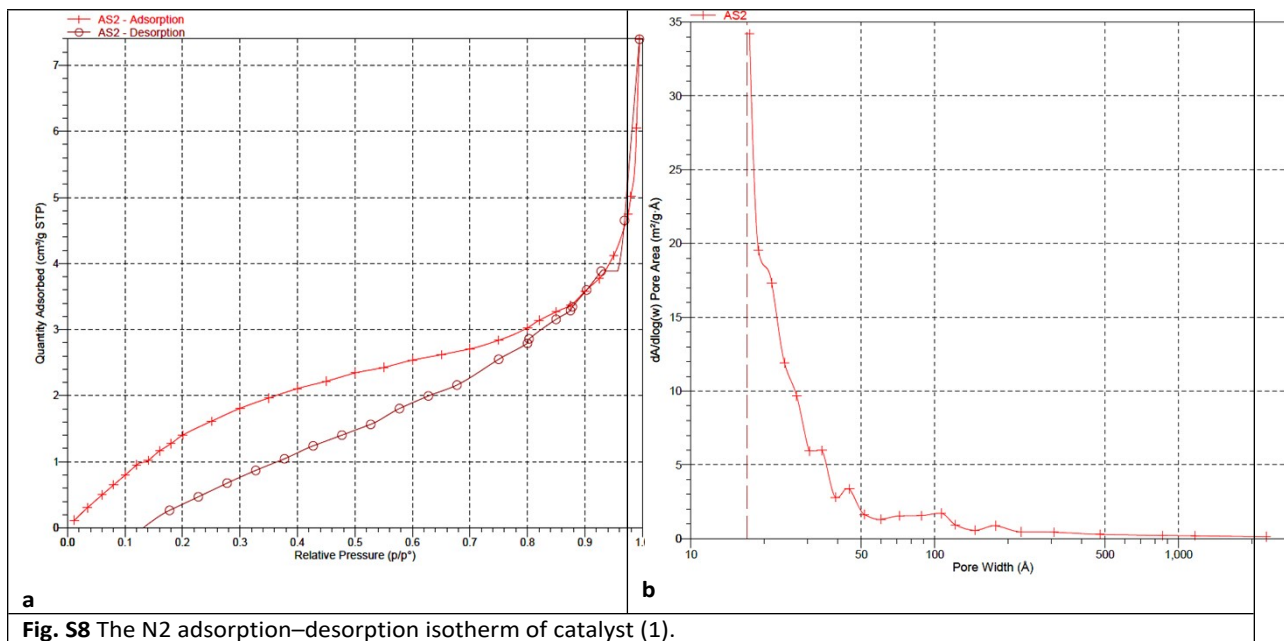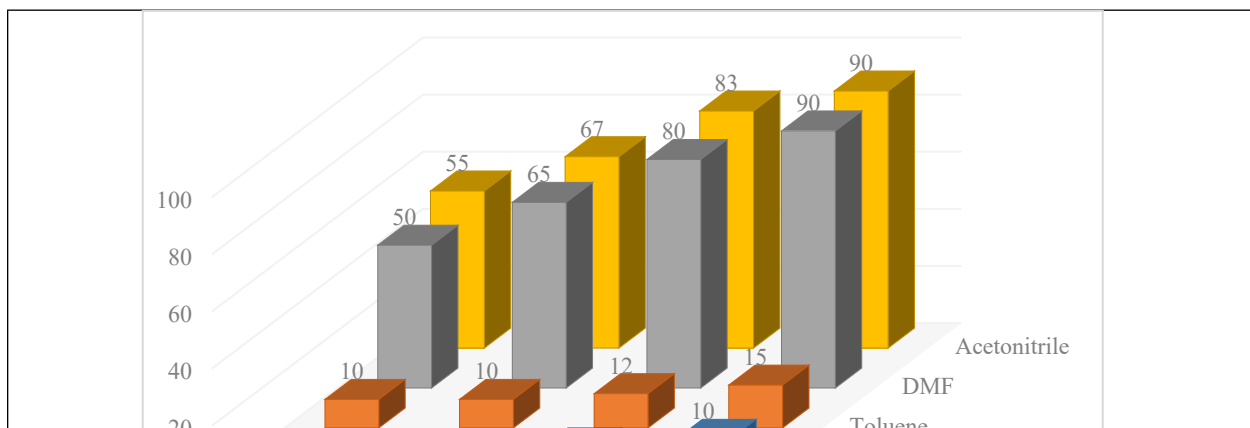

**Fig. S9** Investigation of the optimized amount of catalyst **1** in different solvents for HCR.

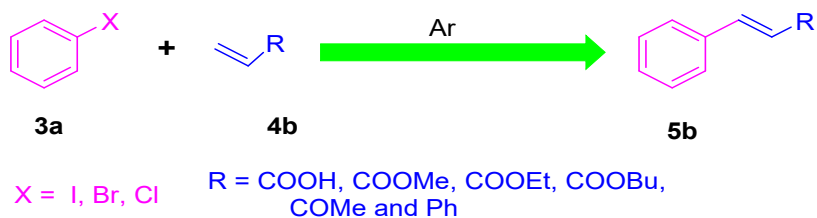

**Table S1.** Optimization of the conditions for HCR in the model reaction of iodobenzene (**3a**), methyl acrylate (**4b**) to afford **5b** under different conditions in the presence of catalyst (**1**).<sup>a</sup>

| Entry | Catalyst       | Base                           | Solvent          | Temp. (°C) | Time (h)     | Yield <sup>b</sup> (%) |
|-------|----------------|--------------------------------|------------------|------------|--------------|------------------------|
| 1     | -              | K <sub>2</sub> CO <sub>3</sub> | DMF              | r.t        | 48           | N.R                    |
| 2     | -              | K <sub>2</sub> CO <sub>3</sub> | DMF              | Reflux     | 48           | N.R                    |
| 3     | Pd@ASP-ETDA-CS | -                              | DMF              | Reflux     | 48           | N.R                    |
| 4     | Pd@ASP-ETDA-CS | -                              | ACN              | Reflux     | 48           | N.R                    |
| 5     | Pd@ASP-ETDA-CS | -                              | Solvent-free     | 80         | 24           | trace                  |
| 6     | Pd@ASP-ETDA-CS | K <sub>2</sub> CO <sub>3</sub> | <b>DMF</b>       | <b>90</b>  | <b>14-20</b> | <b>78-90</b>           |
| 7     | Pd@ASP-ETDA-CS | K <sub>2</sub> CO <sub>3</sub> | <b>ACN</b>       | <b>80</b>  | <b>16-20</b> | <b>75-90</b>           |
| 8     | Pd@ASP-ETDA-CS | K <sub>2</sub> CO <sub>3</sub> | Toluene          | 105        | 36           | Trace                  |
| 9     | Pd@ASP-ETDA-CS | K <sub>2</sub> CO <sub>3</sub> | H <sub>2</sub> O | 105        | 36           | Trace                  |
| 10    | ASP-ETDA       | K <sub>2</sub> CO <sub>3</sub> | DMF              | 130        | 36           | N.R                    |
| 11    | ASP-ETDA-CS    | K <sub>2</sub> CO <sub>3</sub> | DMF              | 130        | 36           | N.R                    |
| 12    | ASP-ETDA       | K <sub>2</sub> CO <sub>3</sub> | ACN              | 80         | 36           | N.R                    |
| 13    | ASP-ETDA-CS    | K <sub>2</sub> CO <sub>3</sub> | ACN              | 80         | 36           | N.R                    |
| 14    | Asparagine     | K <sub>2</sub> CO <sub>3</sub> | DMF              | 130        | 36           | N.R                    |
| 15    | EDTA           | K <sub>2</sub> CO <sub>3</sub> | DMF              | 130        | 36           | N.R                    |

<sup>a</sup>Reaction conditions: aryl halide (**3 a-d**, 2 mmol), alkene (**4 a-f**, 3 mmol), K<sub>2</sub>CO<sub>3</sub> (2 mmol), [Pd@ASP-EDTA-CS (**1**) (4 mg) and solvent (3 ml). <sup>b</sup>Isolated yield.

**Table 2** Investigation of the synthesis of desired derivatives of cinnamic acid (**5a-h**) through HCR catalyzed by catalyst **1** under the optimized conditions. <sup>a</sup>

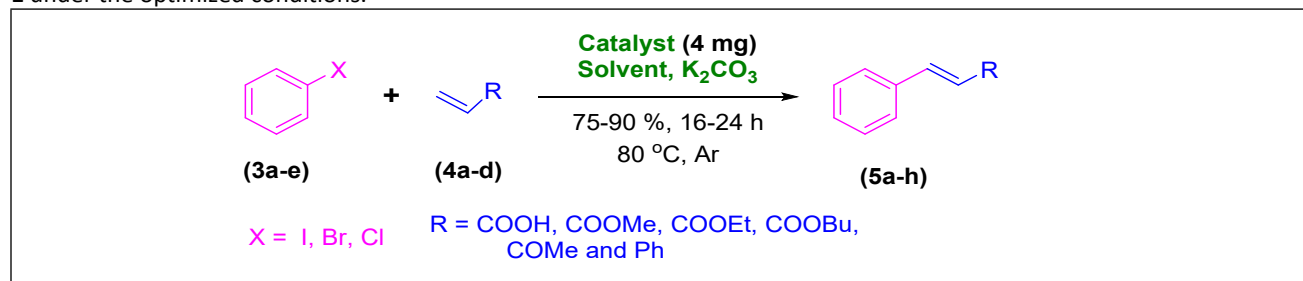

| Entry | Ar-X | Alkene | Product | Time (h) | Temp. (°C) | Yield <sup>b</sup> (%) | m.p. (°C) | m.p. (°C) (Lit.)       |
|-------|------|--------|---------|----------|------------|------------------------|-----------|------------------------|
| 1     |      |        |         | 14       | 80         | 85                     | 131-132   | 133 <sup>116</sup>     |
| 2     |      |        |         | 20       | 80         | 75                     | 131-132   | 133                    |
| 3     |      |        |         | 40       | 80         | 20                     | --        | 133                    |
| 4     |      |        |         | 48       | 80         | trace                  | --        | 212                    |
| 5     |      |        |         | 48       | 80         | trace                  | --        | 224-226 <sup>117</sup> |

|    |                                                                                                  |                                                                                                  |                                                                                                  |    |    |       |        |                          |
|----|--------------------------------------------------------------------------------------------------|--------------------------------------------------------------------------------------------------|--------------------------------------------------------------------------------------------------|----|----|-------|--------|--------------------------|
| 6  | 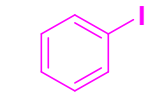<br><b>3a</b>   | <br><b>4b</b>   | <br><b>5b</b>   | 17 | 80 | 90    | 33-35  | 34-38 <sup>118</sup>     |
| 7  | <br><b>3b</b>   | <br><b>4b</b>   | <br><b>5b</b>   | 19 | 80 | 80    | 33-35  | 34-38                    |
| 8  | <br><b>3c</b>   | <br><b>4b</b>   | <br><b>5b</b>   | 36 | 80 | 20    | 33-35  | 34-38                    |
| 9  | <br><b>3d</b>   | <br><b>4b</b>   | <br><b>5g</b>   | 48 | 80 | trace | --     | 34-38                    |
| 10 | <br><b>3e</b>  | <br><b>4b</b>   | <br><b>5h</b>  | 48 | 80 | trace | --     | 34-38                    |
| 11 | <br><b>3a</b> | <br><b>4c</b> | <br><b>5c</b> | 14 | 80 | 85    | liquid | (6.5-7.5) <sup>119</sup> |
| 12 | <br><b>3b</b> | <br><b>4c</b> | <br><b>5c</b> | 20 | 80 | 76    | liquid | 6.5-7.5                  |
| 13 | <br><b>3c</b> | <br><b>4c</b> | <br><b>5c</b> | 36 | 80 | 20    | liquid | 6.5-7.5                  |
| 14 | <br><b>3d</b> | <br><b>4c</b> | <br><b>5g</b> | 48 | 80 | Trace | -      | -                        |
| 15 | <br><b>3e</b> | <br><b>4c</b> | <br><b>5h</b> | 48 | 80 | Trace | -      | -                        |

|    |                                                                                                 |                                                                                                |                                                                                                 |           |           |              |                            |                  |
|----|-------------------------------------------------------------------------------------------------|------------------------------------------------------------------------------------------------|-------------------------------------------------------------------------------------------------|-----------|-----------|--------------|----------------------------|------------------|
| 16 | 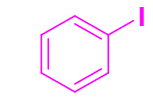<br><b>3a</b>  | <br><b>4d</b> | <br><b>5d</b>  | <b>16</b> | <b>80</b> | <b>85</b>    | <b>liquid<sup>99</sup></b> | <b>B.P.: 271</b> |
| 17 | <br><b>3b</b>  | <br><b>4d</b> | <br><b>5d</b>  | <b>20</b> | <b>80</b> | <b>80</b>    | <b>liquid</b>              | <b>B.P.: 271</b> |
| 18 | <br><b>3c</b>  | <br><b>4d</b> | <br><b>5d</b>  | <b>36</b> | <b>80</b> | <b>20</b>    | <b>liquid</b>              | <b>B.P.: 271</b> |
| 19 | <br><b>3d</b>  | <br><b>4d</b> | <br><b>5g</b>  | <b>48</b> | <b>80</b> | <b>Trace</b> | -                          | -                |
| 20 | <br><b>3e</b> | <br><b>4d</b> | <br><b>5h</b> | <b>48</b> | <b>80</b> | <b>Trace</b> | -                          | -                |

<sup>a</sup> Reaction conditions: aryl halide (**3a-d**, 2 mmol), alkene (**4a-d**, 3 mmol),  $K_2CO_3$  (2 mmol), Pd@ASP-EDTA-CS (**1**, 4mg) and solvent (3 ml). <sup>b</sup> Isolated yield.

**Table S3** The comparison of the obtained results for HCR using catalyst **1** and other catalysts.

| Entry | Catalyst                                                                  | Reaction Conditions       | Catalyst Amount | Time (h)  | Yield (%) | Reference           |
|-------|---------------------------------------------------------------------------|---------------------------|-----------------|-----------|-----------|---------------------|
| 1     | Trifunctional N,N,O-terdentate amido/pyridyl carboxylate Pd(II) complexes | DMF / 145 °C / Base       | 0.01 mol %      | 20        | 3-92      | <a href="#">116</a> |
| 2     | Trifunctional N,N,O-terdentate amido/pyridyl carboxylate Pd(II) complexes | DMF / 145 °C / $Na_2CO_3$ | 0.01 mol %      | 20        | 92        | <a href="#">116</a> |
| 3     | $Pd(OAc)_2$                                                               | NMP / 135 °C / NaOAc      | 0.05 mol %      |           | 12        |                     |
| 4     | CMH-Pd (0)                                                                | DMF / 120 °C / $Et_3N$    | 50 mg           | 6         | 90        | <a href="#">124</a> |
| 5     | NHC-Pd/ $IL@SiO_2$                                                        | NMP / 140 °C / NaOAc      | 0.01 mol %      | 24        | 94        | <a href="#">117</a> |
| 6     | $Pd(quinoline-8-carboxylate)_2$                                           | DMF / 130 °C / $K_2CO_3$  | 0.01 mol %      | 30        | 39-94     | <a href="#">118</a> |
| 7     | OCMCS-Pd                                                                  | DMF / 140 °C / $Et_3N$    | 0.02 mmol       | 12        | 89-98     | <a href="#">125</a> |
| 8     | <b>Pd@ASP-EDTA-CS</b>                                                     | DMF / 90 °C / $K_2CO_3$   | <b>4 mg</b>     | <b>16</b> | <b>90</b> | <b>This work</b>    |
| 9     | <b>Pd@ASP-EDTA-CS</b>                                                     | ACN / 80 °C / $K_2CO_3$   | <b>4 mg</b>     | <b>18</b> | <b>90</b> | <b>This work</b>    |

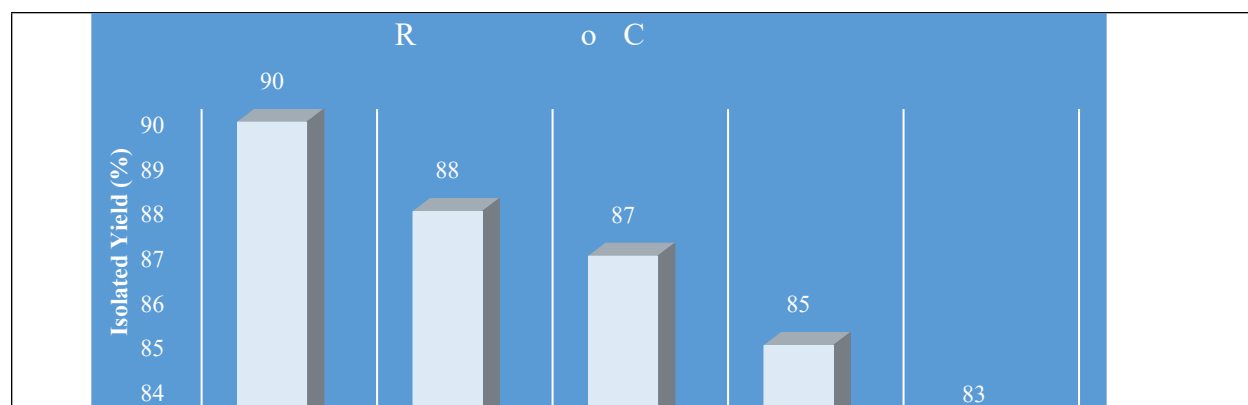

**Fig. S10** Reusability of the Catalyst **1** in the model reaction to afford **5b**.

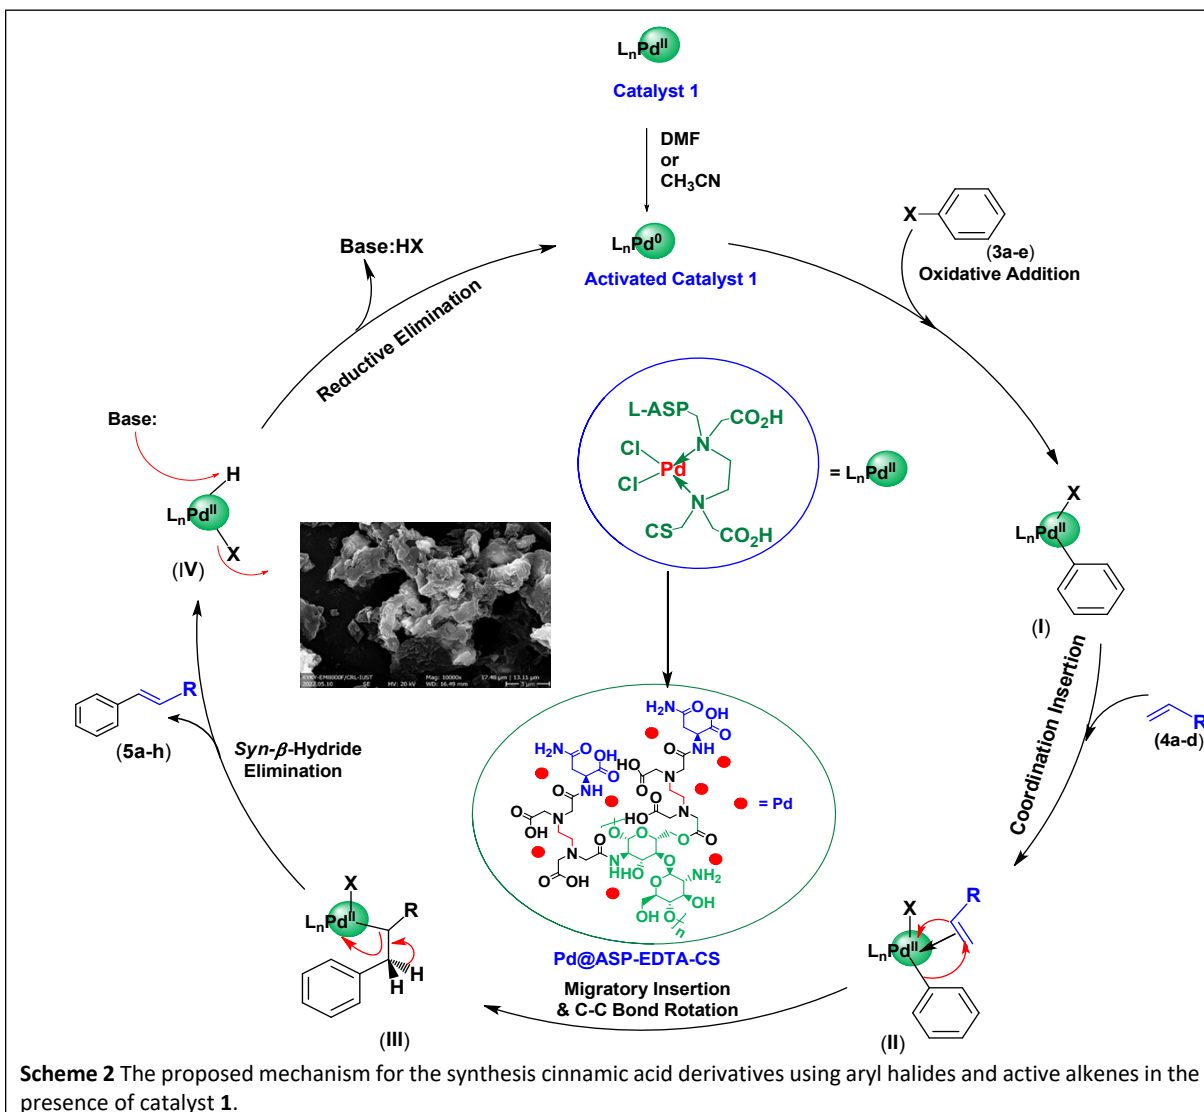

### Spectral data of the selected products

#### Cinnamic acid (5c):

White crystals, m.p. = 132-133 °C; FTIR (KBr,  $\text{cm}^{-1}$ )  $\nu$  = 3410, 2945, 1718, 1640, 1580, 1452;  $^1\text{H}$  NMR (500MHz,  $\text{DMSO-d}_6$ )  $\delta$  (ppm) = 12.40 (s, 1H), 7.59 (d,  $J$  = 16.0 Hz, 1H), 7.71-7.63 (m, 2H), 7.44-7.32 (m, 3H), 6.52 (d,  $J$  = 16.0 Hz, 1H) ppm.

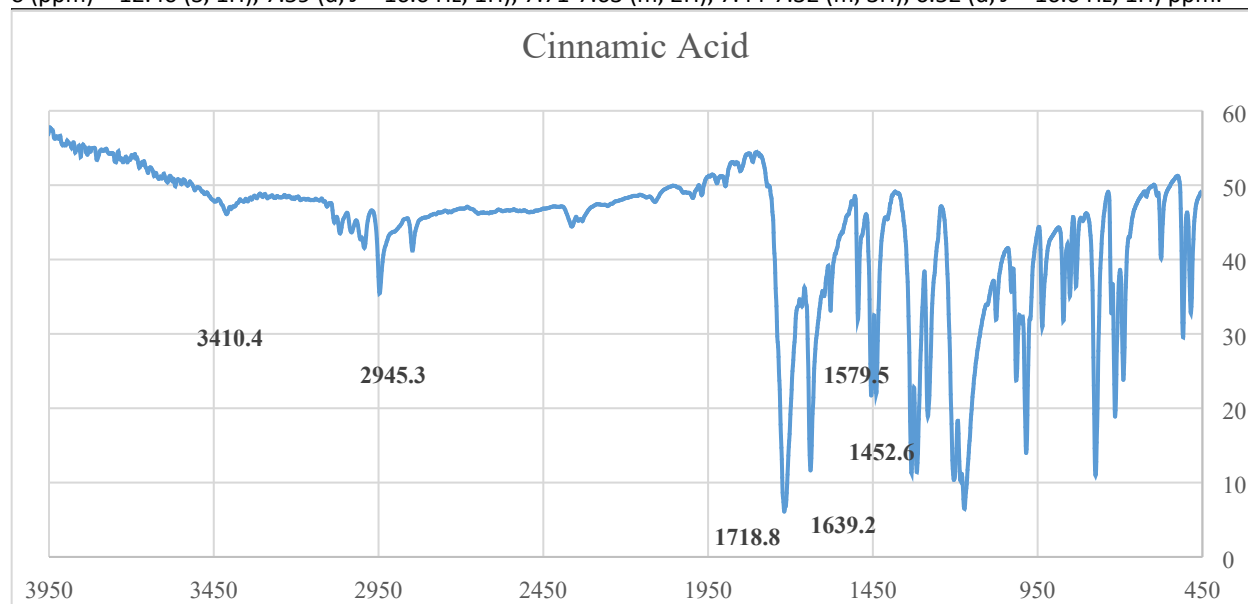

**Fig. S11** FTIR spectrum of cinnamic acid.

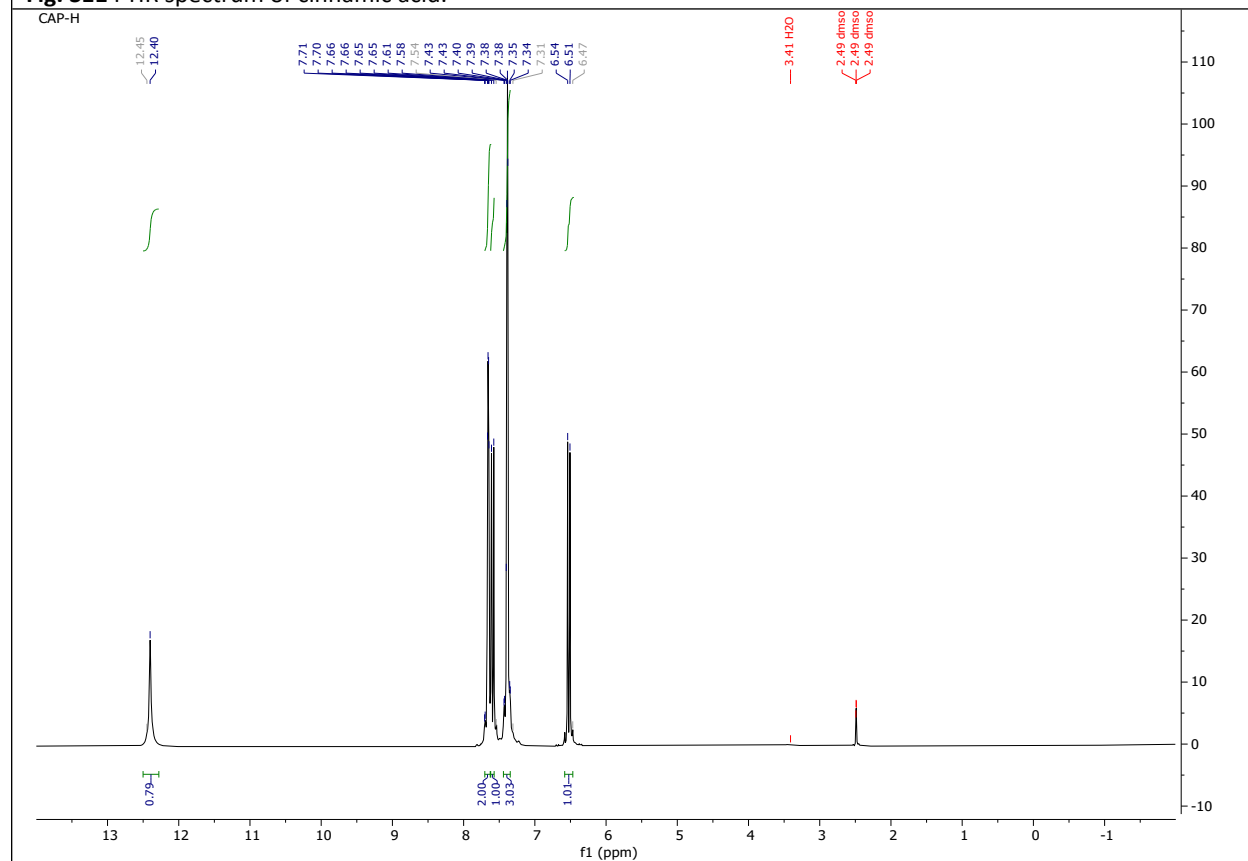

**Fig. S12**  $^1\text{H}$  NMR of cinnamic acid.

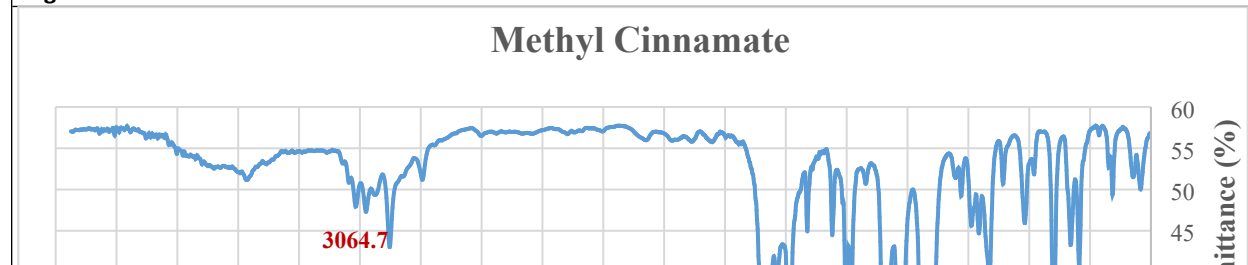

**Fig. S13** FTIR spectrum of Methyl Cinnamate.

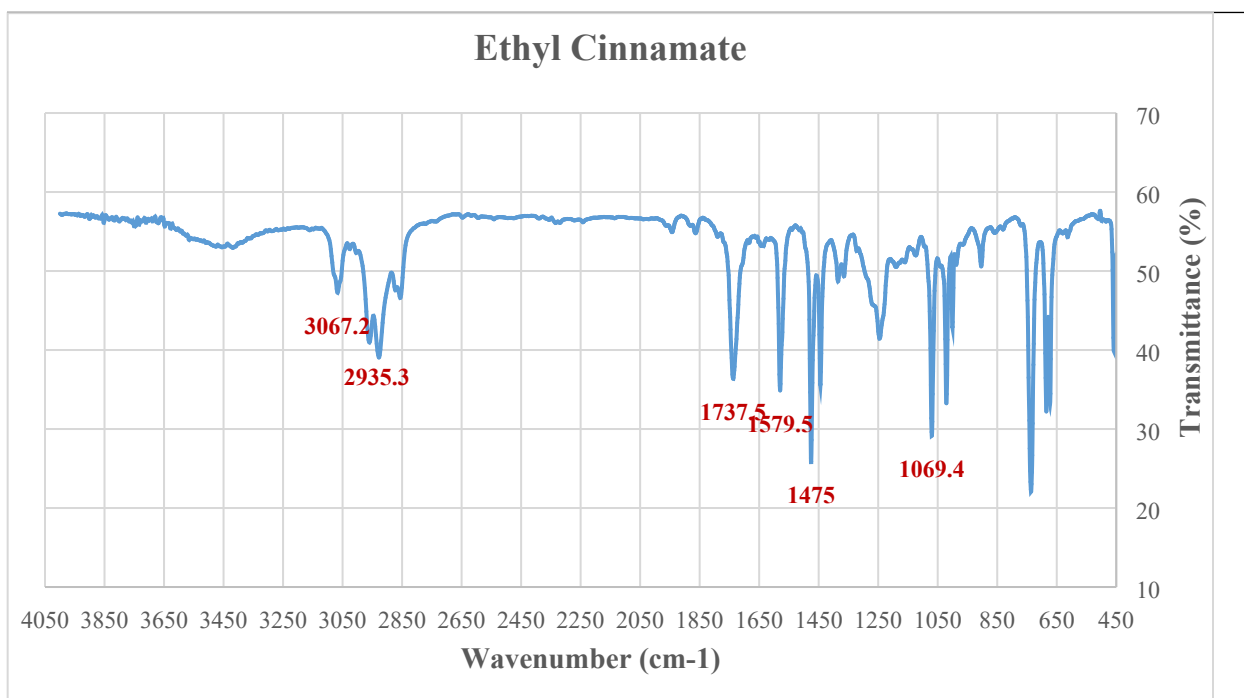

**Fig. S14** FTIR spectrum of Ethyl Cinnamate.

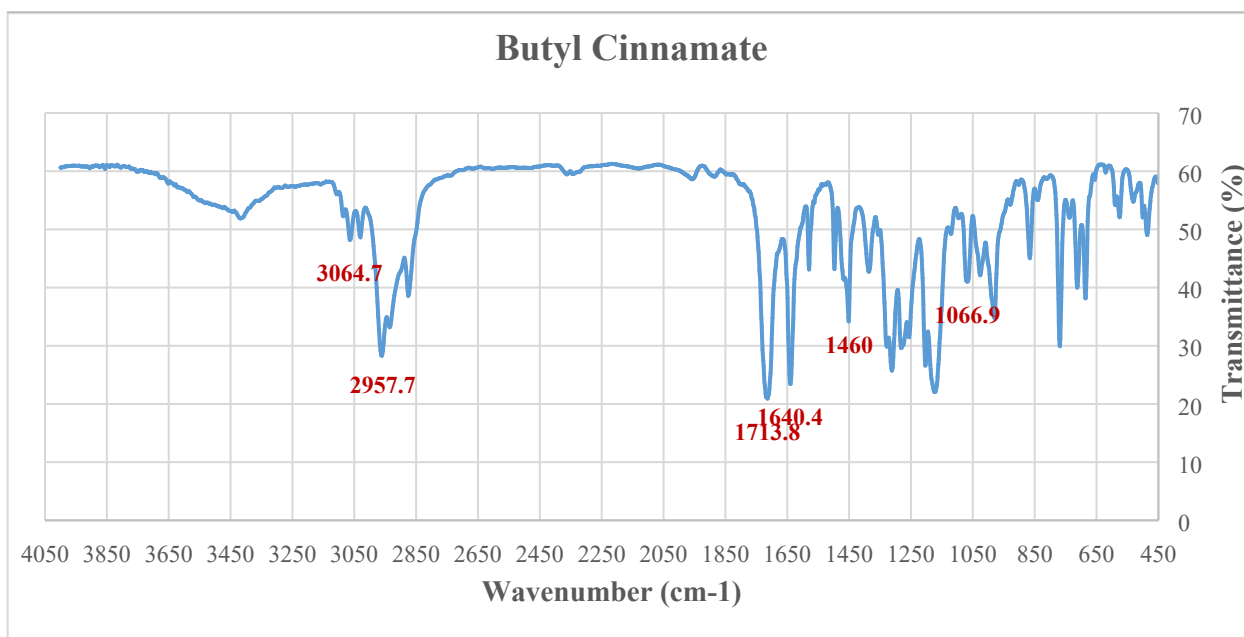

**Fig. S15** FTIR spectrum of Butyl Cinnamate.

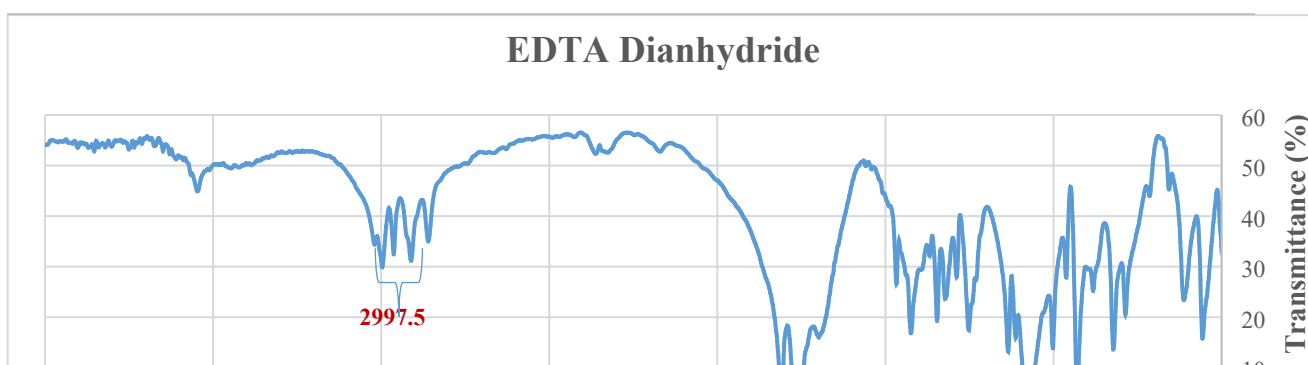



**Fig. S16** FTIR spectrum of EDTA Dianhydride.

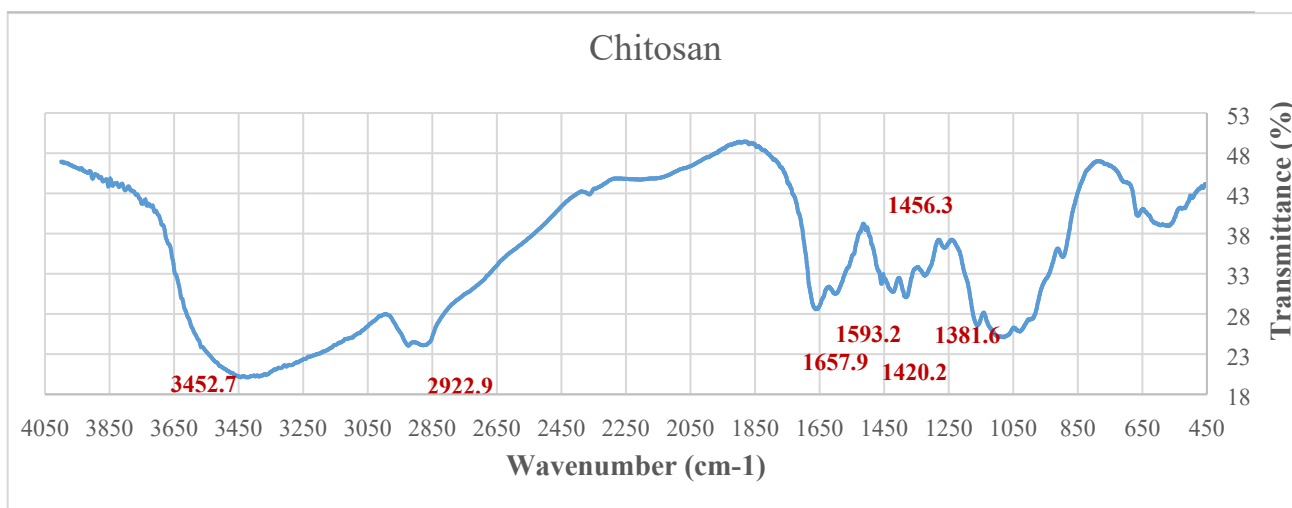

**Fig. S17** FTIR spectrum of Chitosan.

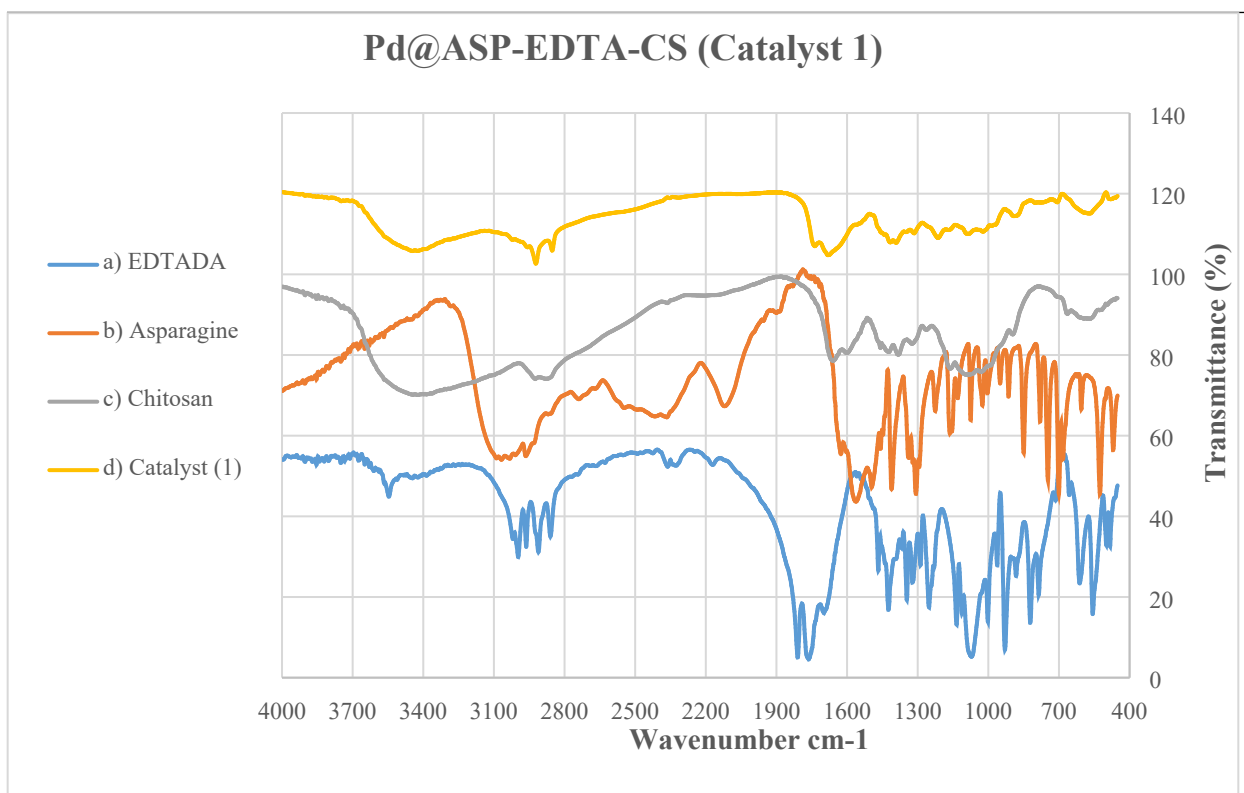

**Fig. S18** FTIR spectra of the Pd@ASP-EDTA-CS catalyst (1).
